# Supplementary material for: Evidence of two differentially regulated elongasomes in Salmonella
Source: PubMed Central journal article supplement (PMC10492807; doi:10.1038/s42003-023-05308-w), 2023-09-09
Supplement: 42003_2023_5308_MOESM2_ESM.pdf [file 42003_2023_5308_MOESM2_ESM.pdf]

## Supplementary Information

Evidence of two differentially regulated  
elongasomes in *Salmonella*

Sónia Castanheira and Francisco García-del Portillo

**This PDF includes:**

Supplementary **Figures 1 to 22.**

Supplementary **Table 1.**

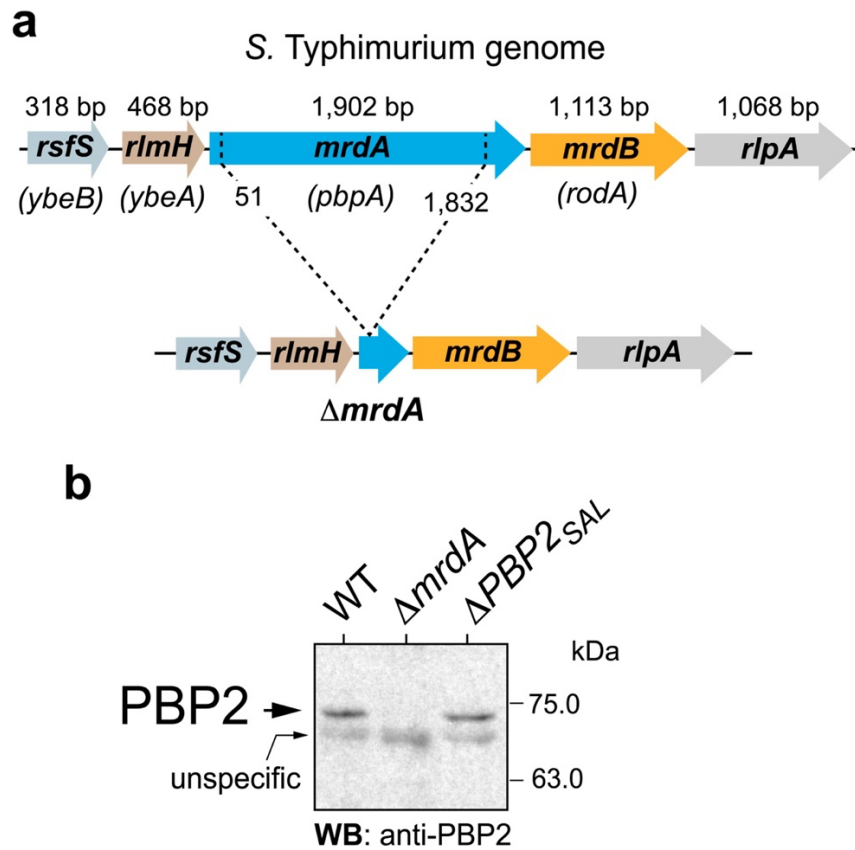

**Supplementary Fig. 1. Construction of a *S. Typhimurium*  $\Delta mrda$  mutant defective in PBP2.**

**(a)** Region of the *S. Typhimurium* genome in which the gene encoding PBP2, *mrda*, maps. Downstream is *mrdb*, the gene encoding the SEDS protein RodA, which contributes to PG synthesis with GTase activity in concert with the TPase activity of PBP2. Dashed lines indicate the region that was deleted in the  $\Delta mrda$  mutant encompassing nucleotide 51 to 1,832 of the coding sequence. **(b)** Western blot analysis with anti-PBP2 antibody showing the deficiency in PBP2 in the  $\Delta mrda$  mutant. Positions and sizes of molecular weight markers (in kDa) are indicated. The position of an unspecific protein detected with the antibody is also shown ( $n=2$  biological).

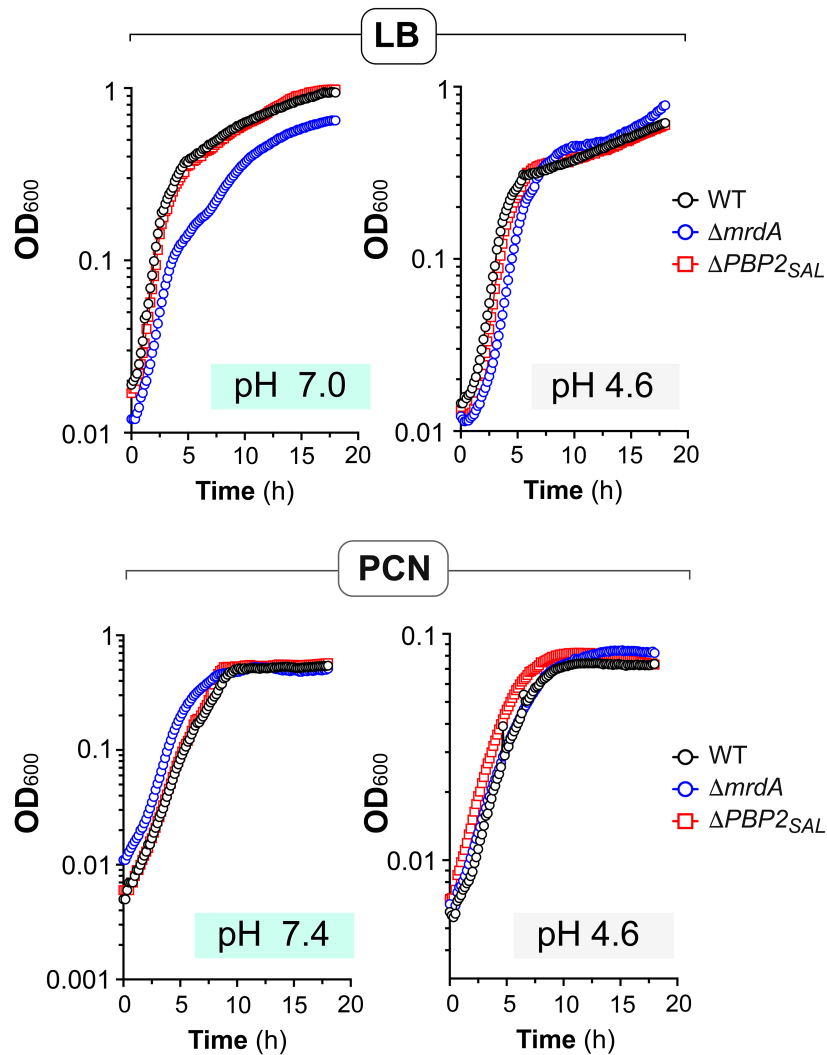

**Supplementary Fig. 2. Growth kinetics of *S. Typhimurium* isogenic mutants defective in PBP2 or PBP2<sub>SAL</sub> growing in nutrient rich (LB) or minimal (PCN) media at neutral or acidic pH.** The growth of these strains under the indicated conditions was monitored in a Tecan Spark microplate reader at 37°C for 20 h. Note that the loss of PBP2 ( $\Delta mrdA$  mutant) results in progressive decrease of the growth rate in LB medium at neutral pH, condition in which cells undergo drastic morphological changes as giant rounded cells (Fig. 1a, main manuscript). This  $\Delta mrdA$  mutant however increases in mass similarly to wild type bacteria at neutral pH in PCN medium. Under this condition, cells acquire rounded morphology but do not show signs of blockage in cell division (Fig. 1a, main manuscript). Data are from a representative experiment ( $n=3$  biological).

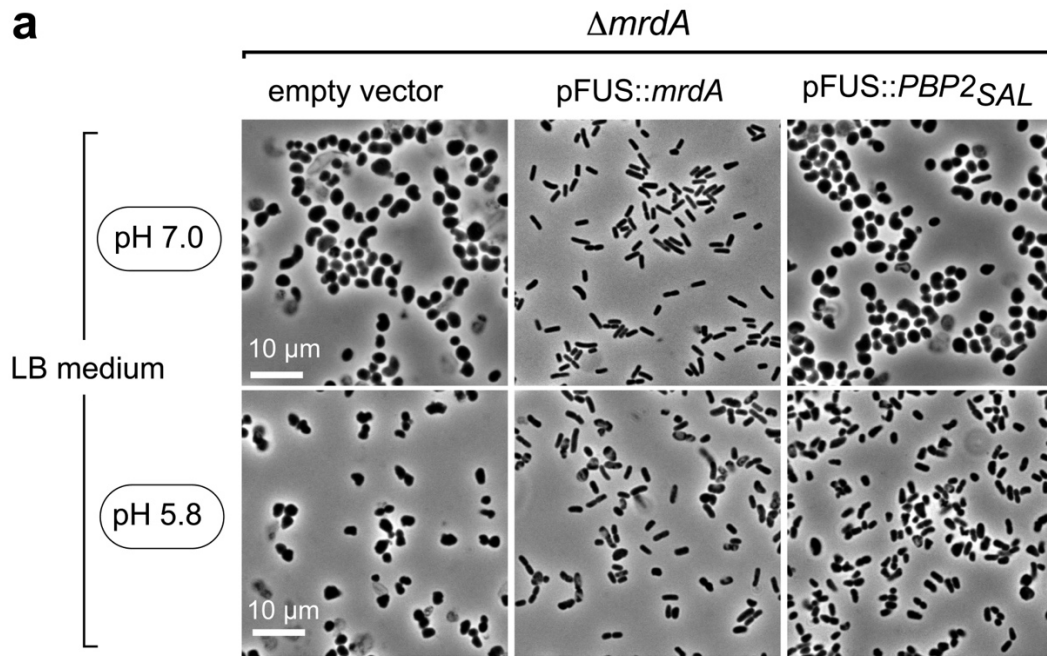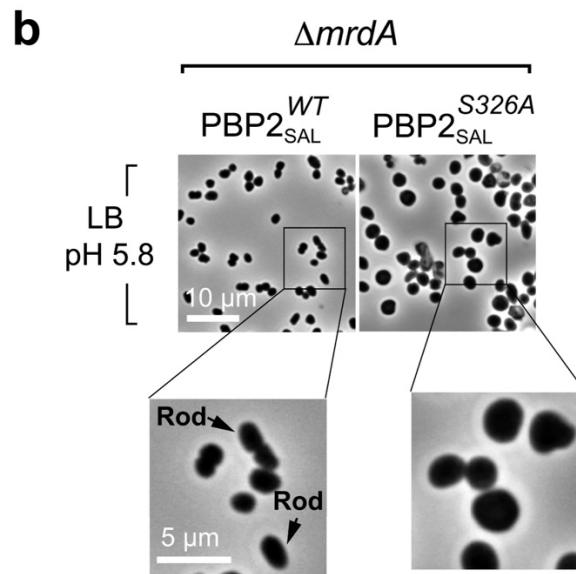

**Supplementary Fig. 3. The serine326 (S326) of PBP2<sub>SAL</sub> is required for catalysis. (a)** Morphology of  $\Delta mrdA$  cells bearing plasmids with the pFUS backbone for ectopic expression of wild-type PBP2 or PBP2<sub>SAL</sub>. A strain bearing the empty vector (pFUS) was used as control. Unlike PBP2, expression of PBP2<sub>SAL</sub> restores rod shape only in acidic pH (5.8) ( $n=2$  biological). Scale bar, 10  $\mu$ m. **(b)** Expression in  $\Delta mrdA$  cells of a PBP2<sub>SAL</sub> variant with a S326A mutation does not generate rod shape morphology. This result demonstrates the strict requirement for catalysis of the S326 residue and that PBP2<sub>SAL</sub> can promote cell elongation in acidic pH in the absence of PBP2 ( $n=2$  biological). Scale bars, 10  $\mu$ m (low magnification) and 5  $\mu$ m (high magnification).

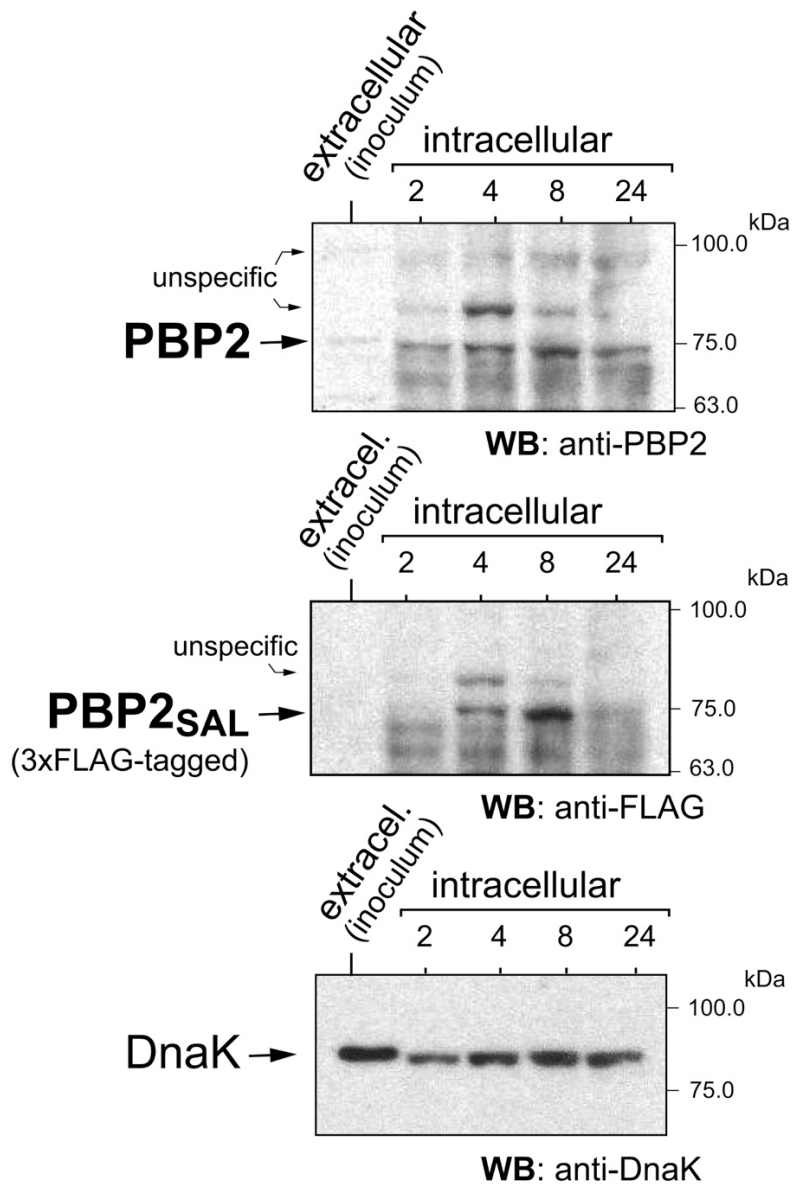

**Supplementary Fig. 4. PBP2<sub>SAL</sub> expression is upregulated by *S. Typhimurium* inside fibroblasts.** Western blot analyses showing relative levels of PBP2, PBP2<sub>SAL</sub> and DnaK in total protein extracts prepared from extracellular bacteria (input, inoculum) and intracellular bacteria at the indicated post-infection times (2, 4, 8, and 24 h). For this assay, wild type bacteria bearing the PBP2<sub>SAL</sub>::3xFLAG epitope were grown overnight in LB pH 7.0 and used to infect cultured NRK-49F rat fibroblasts ( $n=2$  biological). Positions and sizes of molecular weight markers (in kDa) are indicated. The position of unspecific protein detected with the antibodies is also shown.

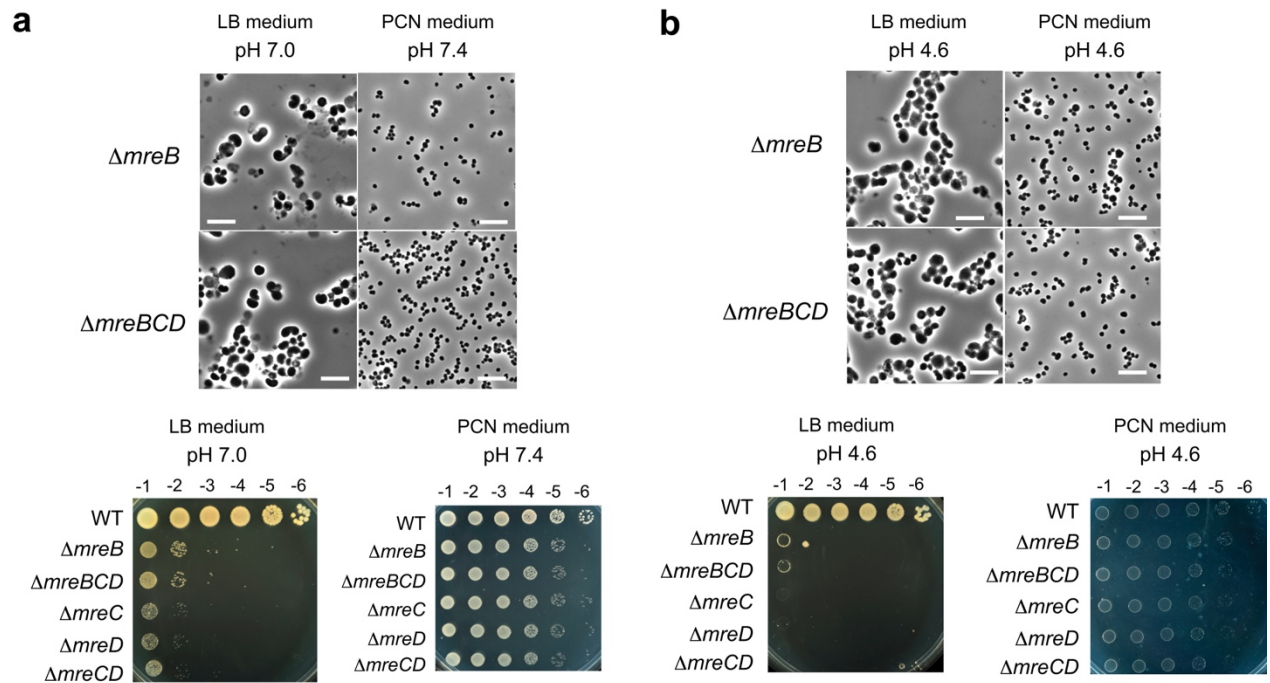

**Supplementary Fig. 5. MreB, MreC and MreD are essential in *S. Typhimurium* to generate rod shape in both neutral and acidic pH.** (a) Morphology and survival of isogenic mutants *ΔmreB* and *ΔmreBCD* in nutrient-rich (LB) and nutrient-poor (PCN) media at neutral pH (7.0 in LB, 7.4 in PCN). Scale bar, 10  $\mu$ m. Morphology of the *ΔmreC* and *ΔmreD* single mutants was indistinguishable from that of *ΔmreB* and *ΔmreBCD* isogenic strains. The survival assay involving spotting of serial dilutions is depicted for all strains ( $n=3$  biological). (b) Morphology and survival of the same set of strains described in (a) but grown in LB or PCN media in acidic pH (4.6). Scale bar, 10  $\mu$ m. Morphology of the *ΔmreC* and *ΔmreD* single mutants in acidic pH was also indistinguishable from that of *ΔmreB* and *ΔmreBCD* isogenic strains ( $n=3$  biological). Scale bar, 10  $\mu$ m.

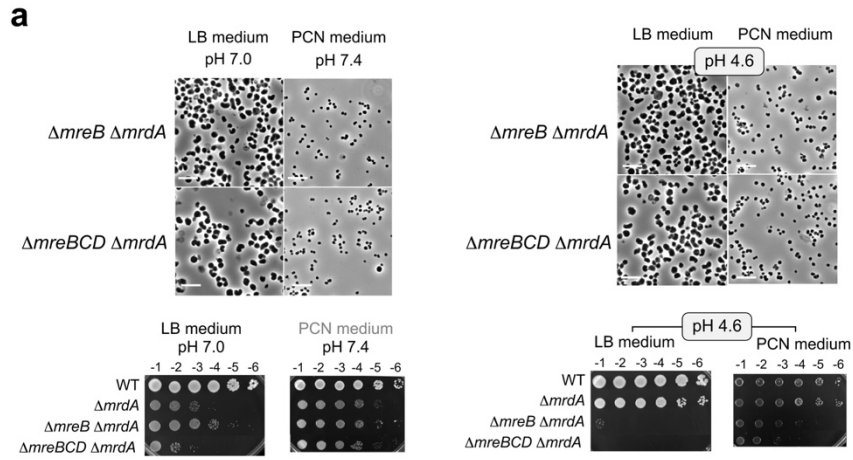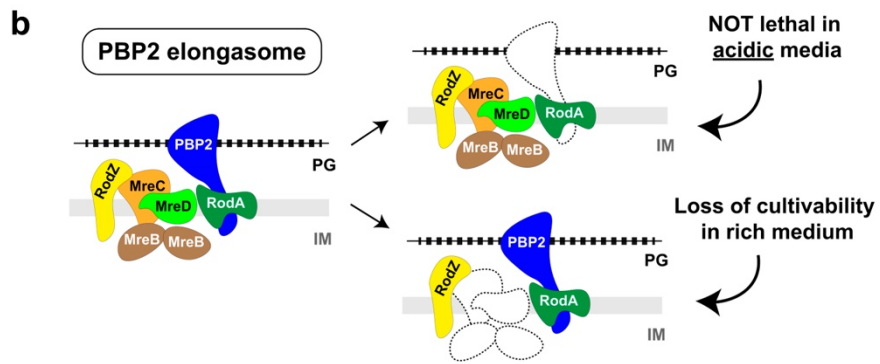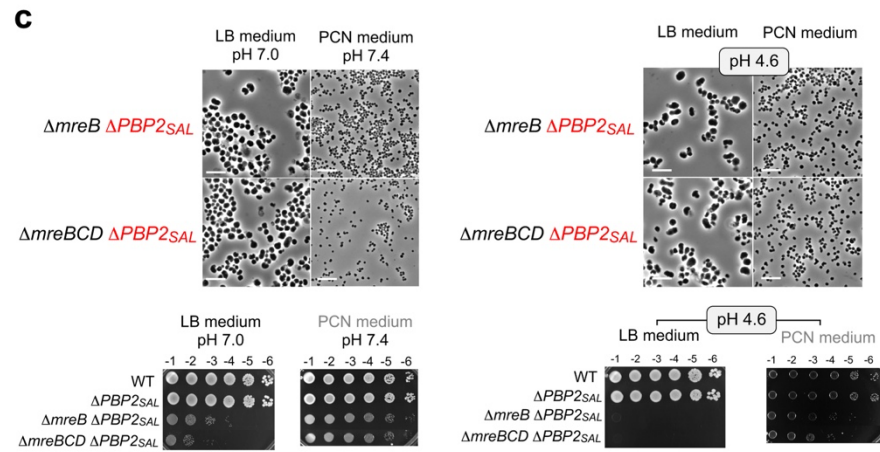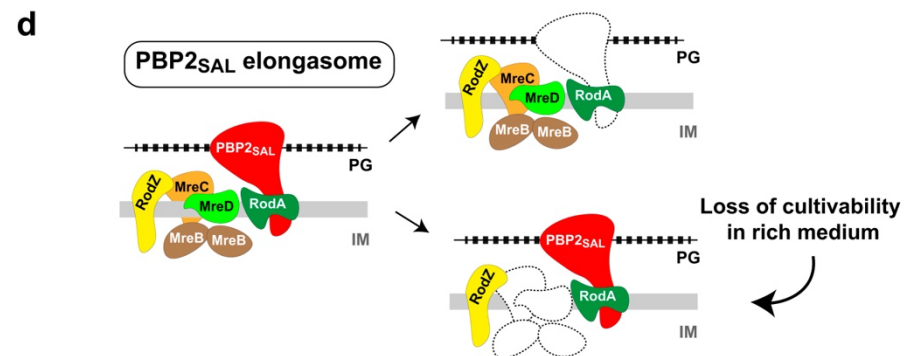

**Supplementary Fig. 6. Unlike in neutral pH, the loss of PBP2 in acidic pH does not affect survival in the presence of MreB, MreC and MreD. (a)** Morphology and viability of isogenic  $\Delta mreB\Delta mrdA$  and  $\Delta mreBCD\Delta mrdA$  cells grown in the indicated nutrient media and pH ( $n=3$  biological). Scale bar, 10  $\mu\text{m}$ . **(b)** Scheme of the essentiality of the different components in the PBP2 elongasome. The loss of PBP2 or MreBCD affect cultivability in neutral pH, however PBP2 is dispensable in acidic pH. **(c)** Morphology and viability of isogenic  $\Delta mreB\Delta PBP2_{SAL}$  and  $\Delta mreBCD\Delta PBP2_{SAL}$  cells grown in the indicated nutrient media and pH ( $n=3$  biological). Scale bar, 10  $\mu\text{m}$ . **(d)** Scheme of the essentiality of the different components in the PBP2<sub>SAL</sub> elongasome, active in acidic pH conditions. Loss of cultivability is observed only upon loss of the MreBCD components.



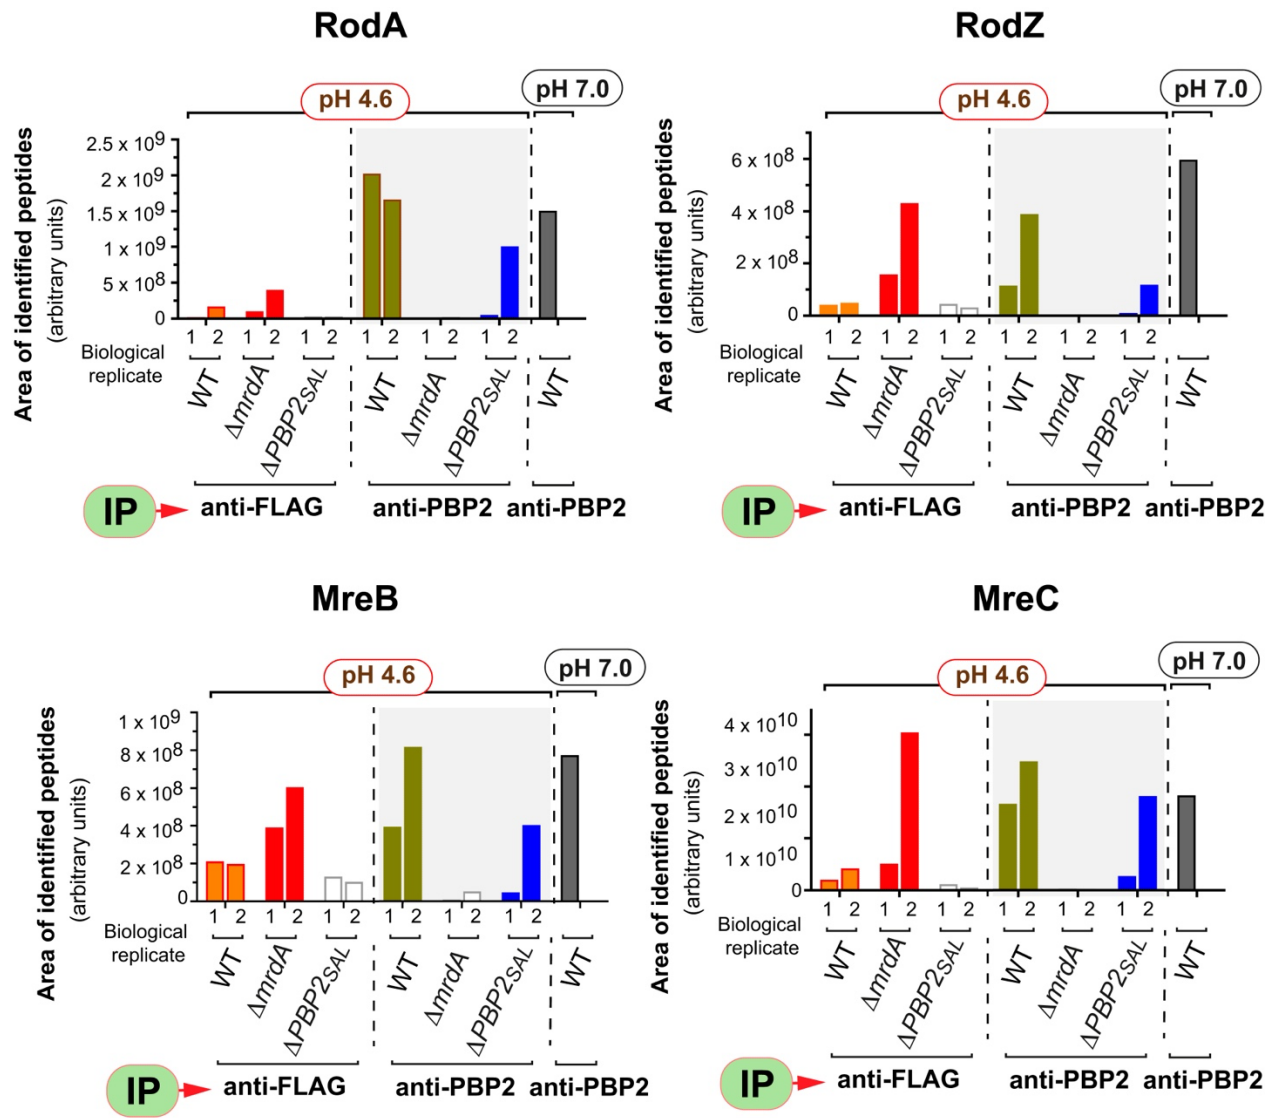

**Supplementary Fig. 7. Elongasome proteins identified by mass spectrometry as components of the PBP2- and PBP2<sub>SAL</sub>-morphogenetic complexes.** The sum of areas corresponding to distinct peptides identified for each of the indicated proteins is shown for the complexes immunoprecipitated (IP) with either anti-FLAG (PBP2<sub>SAL</sub>-3xFLAG) or anti-PBP2 antibodies in the strains shown ( $n=2$  biological, except sample of neutral pH,  $n=1$ ). See complete set of data for individual peptides in the "Supplementary Data" file. The figures also refer to the distinct pH used. The elongasomes immunoprecipitated from wild type (WT),  $\Delta mrdA$  and  $\Delta PBP2_{SAL}$  strains were pull-down from bacteria grown in LB pH 4.6. For WT cells, an additional sample was analyzed from bacteria grown at pH 7.0.

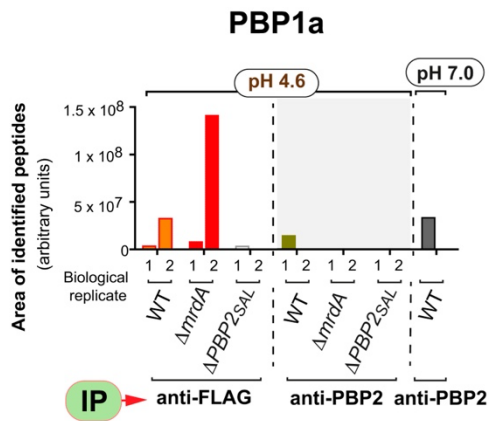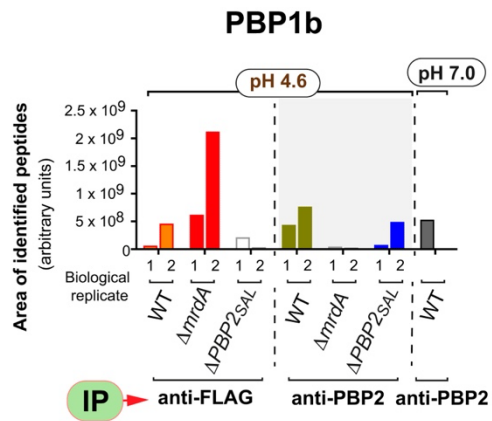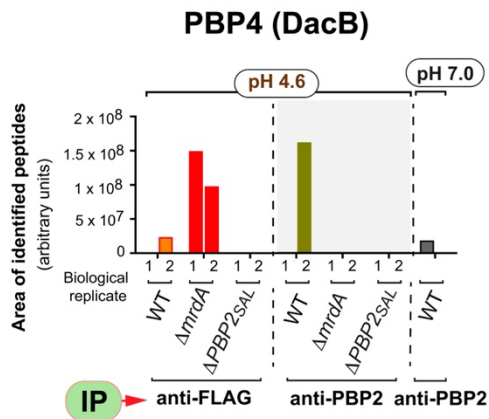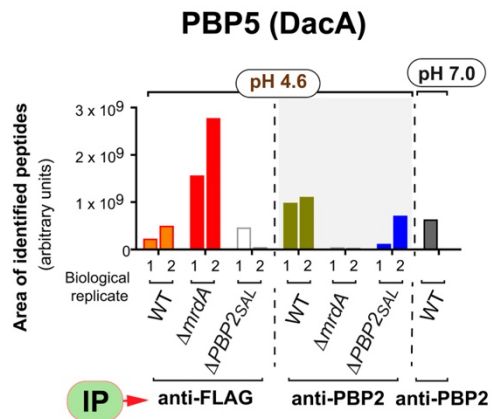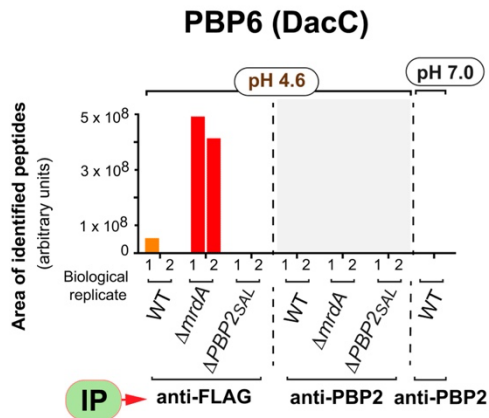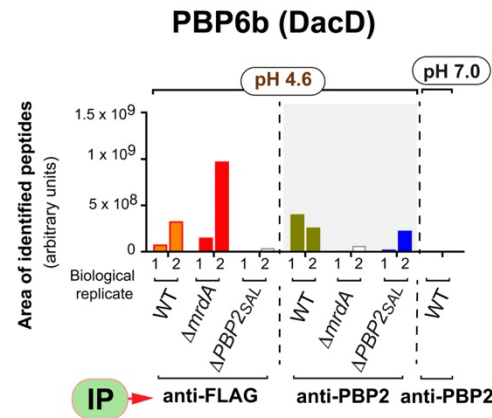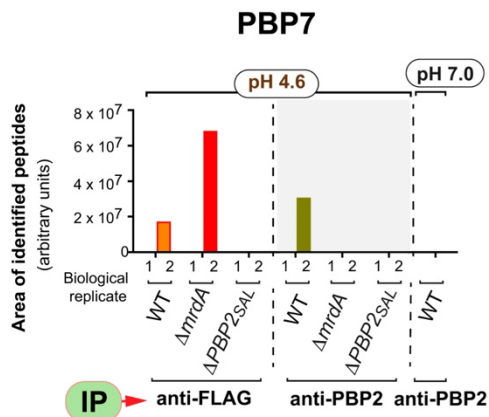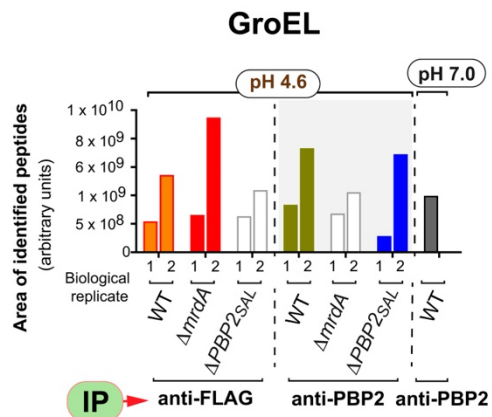

**Supplementary Fig. 8. PBPs identified by mass spectrometry as components of the PBP2- and PBP2<sub>SAL</sub>-elongasomes.** The sum of areas corresponding to peptides identified for each of the indicated proteins is shown for the complexes immunoprecipitated (IP) with either anti-FLAG (PBP2<sub>SAL</sub>-3xFLAG) or anti-PBP2 antibodies in the isogenic strains shown ( $n=2$  biological, except sample of neutral pH,  $n=1$ ). See complete set of data for individual peptides in the "Supplementary Data" file. Growth conditions were LB medium pH 4.6 for wild type (WT),  $\Delta mrdA$  and  $\Delta PBP2_{SAL}$  strains. For WT bacteria, an additional sample was analyzed at pH 7.0. GroEL was analyzed as unrelated and unspecific control protein detected at similar level in all samples.

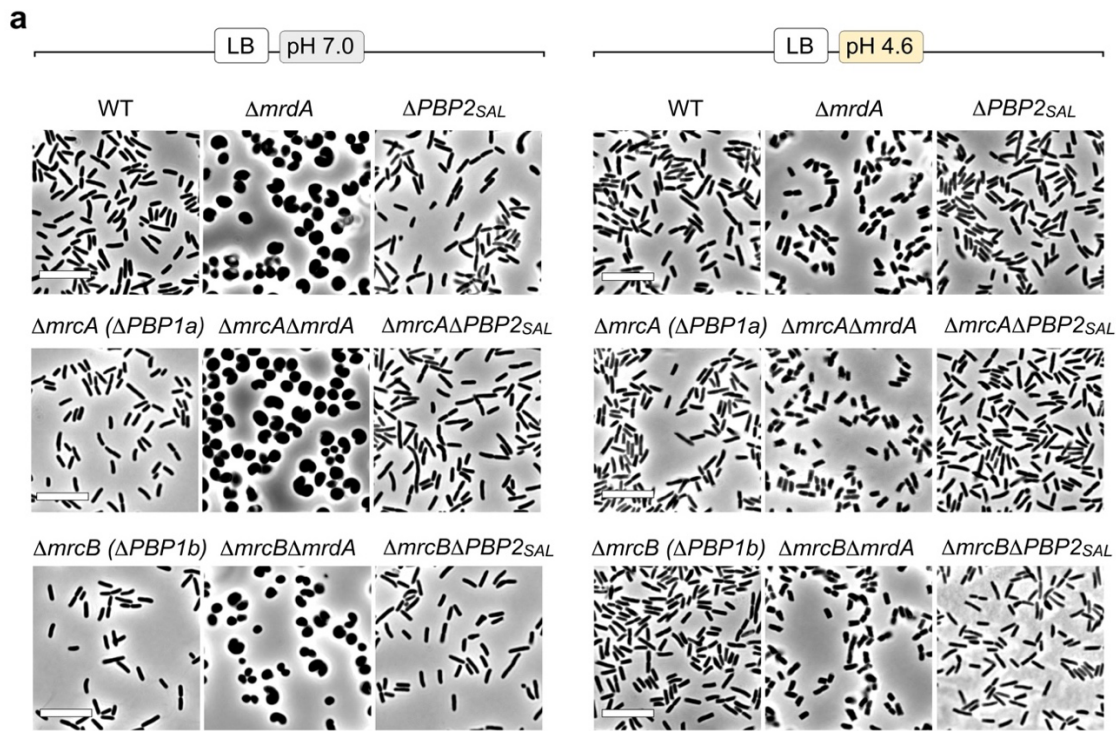

**b**

|                                 | pH 7.0          |                | Number of cells (n) | OD <sub>600</sub> value | pH 4.6      |             | Number of cells (n) | OD <sub>600</sub> value |
|---------------------------------|-----------------|----------------|---------------------|-------------------------|-------------|-------------|---------------------|-------------------------|
|                                 | Length (L) (μm) | Width (W) (μm) |                     |                         | L (μm)      | W (μm)      |                     |                         |
| WT                              | 3.11 ± 0.84     | 0.76 ± 0.08    | 765                 | 0.45                    | 3.13 ± 0.83 | 0.86 ± 0.11 | 373                 | 0.45                    |
| $\Delta mrdA$                   | (giant cells)   | (giant cells)  | --                  | 0.23                    | 2.45 ± 0.66 | 1.05 ± 0.16 | 539                 | 0.32                    |
| $\Delta PBP2_{SAL}$             | 3.19 ± 0.95     | 0.75 ± 0.10    | 434                 | 0.44                    | 2.90 ± 0.79 | 0.73 ± 0.11 | 769                 | 0.47                    |
| $\Delta mrcA (\Delta PBP1a)$    | 2.90 ± 0.89     | 0.77 ± 0.09    | 571                 | 0.48                    | 2.87 ± 0.74 | 0.73 ± 0.11 | 796                 | 0.46                    |
| $\Delta mrcA \Delta mrdA$       | (giant cells)   | (giant cells)  | --                  | 0.20                    | 2.48 ± 0.67 | 0.99 ± 0.13 | 662                 | 0.29                    |
| $\Delta mrcA \Delta PBP2_{SAL}$ | 3.30 ± 0.99     | 0.78 ± 0.09    | 467                 | 0.40                    | 2.88 ± 0.78 | 0.71 ± 0.09 | 941                 | 0.47                    |
| $\Delta mrcB (\Delta PBP1b)$    | 3.24 ± 0.88     | 0.77 ± 0.10    | 386                 | 0.43                    | 3.00 ± 0.79 | 0.76 ± 0.11 | 662                 | 0.42                    |
| $\Delta mrcB \Delta mrdA$       | (giant cells)   | (giant cells)  | --                  | 0.24                    | 2.25 ± 0.57 | 0.99 ± 0.15 | 606                 | 0.28                    |
| $\Delta mrcB \Delta PBP2_{SAL}$ | 3.45 ± 0.96     | 0.74 ± 0.09    | 632                 | 0.41                    | 2.88 ± 0.76 | 0.72 ± 0.11 | 531                 | 0.43                    |

**Supplementary Fig. 9. The morphological parameters of *S. Typhimurium* mutants lacking PBP2 or PBP2<sub>SAL</sub> growing in LB are not altered by the loss of PBP1a or PBP1b. (a)** Images of the indicated mutants. Bacteria were collected in the exponential phase at neutral and acidic pH. WT, wild type. Scale bar, 10 μm. **(b)** Average length and width determined with ObjectJ (<https://sils.fnwi.uva.nl/bcb/objectj/>) for the listed isogenic mutants. Indicated are the number of cells that were monitored and the OD<sub>600</sub> value at which bacteria were collected. Mutants lacking PBP2 exhibit at neutral pH aberrant morphologies as giant rounded cells with gross differences in length and width, reason for which they were not examined with ObjectJ. Data are from a representative experiment (n=2 biological).

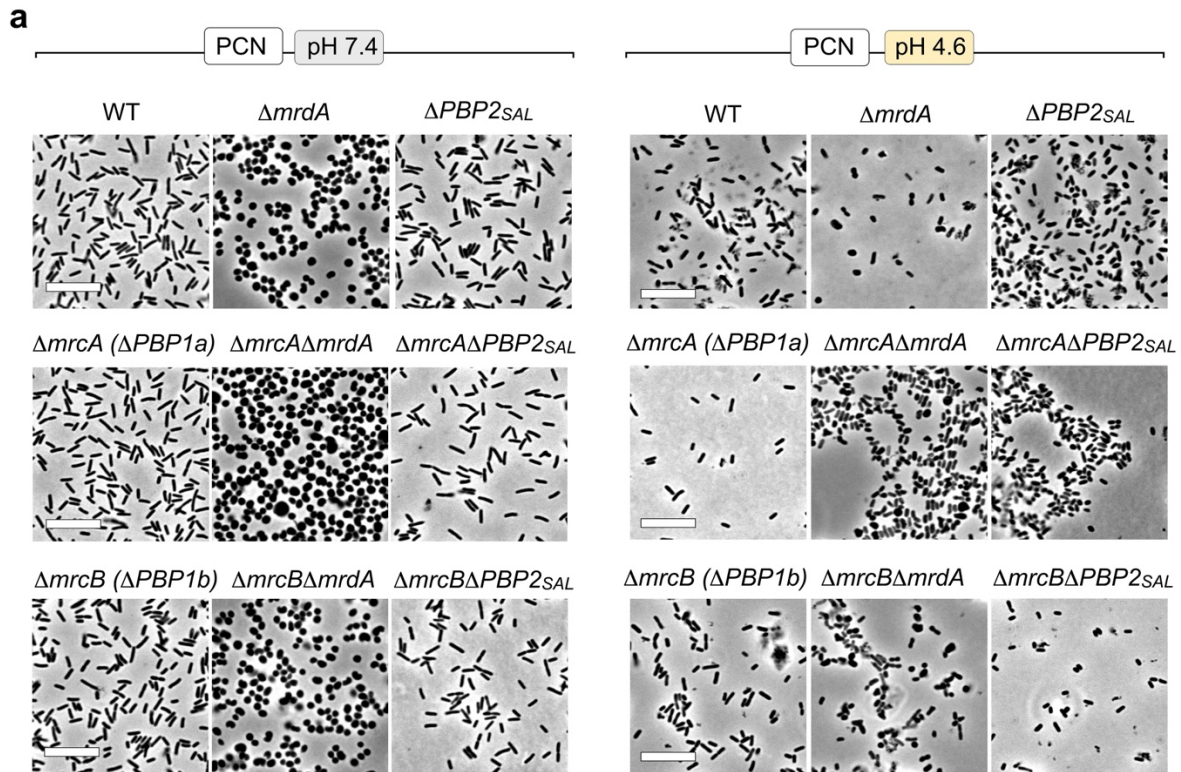

**b**

|                                            | pH 7.4          |                | Number of cells ( <i>n</i> ) | OD <sub>600</sub> value | pH 4.6      |             | Number of cells ( <i>n</i> ) | OD <sub>600</sub> value |
|--------------------------------------------|-----------------|----------------|------------------------------|-------------------------|-------------|-------------|------------------------------|-------------------------|
|                                            | Length (L) (μm) | Width (W) (μm) |                              |                         | L (μm)      | W (μm)      |                              |                         |
| WT                                         | 2.49 ± 0.58     | 0.65 ± 0.15    | 637                          | 0.24                    | 2.12 ± 0.50 | 0.72 ± 0.14 | 237                          | 0.06                    |
| Δ <i>mrdA</i>                              | 1.63 ± 0.31     | 1.22 ± 0.14    | 547                          | 0.26                    | 1.75 ± 0.34 | 0.91 ± 0.19 | 184                          | 0.04                    |
| Δ <i>PBP2</i> <sub>SAL</sub>               | 2.48 ± 0.60     | 0.67 ± 0.17    | 498                          | 0.26                    | 1.83 ± 0.37 | 0.83 ± 0.12 | 323                          | 0.06                    |
| Δ <i>mrcA</i> (Δ <i>PBP1a</i> )            | 2.52 ± 0.61     | 0.65 ± 0.14    | 721                          | 0.25                    | 2.18 ± 0.54 | 0.72 ± 0.09 | 135                          | 0.06                    |
| Δ <i>mrcA</i> Δ <i>mrdA</i>                | 1.53 ± 0.28     | 1.15 ± 0.16    | 620                          | 0.26                    | 1.77 ± 0.30 | 0.87 ± 0.20 | 208                          | 0.06                    |
| Δ <i>mrcA</i> Δ <i>PBP2</i> <sub>SAL</sub> | 2.58 ± 0.67     | 0.67 ± 0.16    | 433                          | 0.23                    | 1.85 ± 0.34 | 0.80 ± 0.15 | 143                          | 0.06                    |
| Δ <i>mrcB</i> (Δ <i>PBP1b</i> )            | 2.25 ± 0.55     | 0.70 ± 0.16    | 619                          | 0.26                    | 2.15 ± 0.47 | 0.73 ± 0.16 | 185                          | 0.05                    |
| Δ <i>mrcB</i> Δ <i>mrdA</i>                | 1.64 ± 0.36     | 1.21 ± 0.14    | 516                          | 0.26                    | 1.84 ± 0.37 | 0.85 ± 0.18 | 189                          | 0.05                    |
| Δ <i>mrcB</i> Δ <i>PBP2</i> <sub>SAL</sub> | 2.43 ± 0.57     | 0.69 ± 0.17    | 404                          | 0.19                    | 1.95 ± 0.34 | 0.73 ± 0.15 | 106                          | 0.04                    |

**Supplementary Fig. 10. The morphological parameters of *S. Typhimurium* mutants defective in PBP2 or PBP2<sub>SAL</sub> growing in minimal PCN medium are not altered by the loss of PBP1a or PBP1b. (a) Images of the indicated mutants. Bacteria were collected in the exponential phase at neutral and acidic pH. WT, wild type. Scale bar, 10 μm. (b) Average length and width determined with ObjectJ (<https://sils.fnwi.uva.nl/bcb/objectj/>) for the listed isogenic mutants. Indicated are the number of cells that were monitored and the OD<sub>600</sub> value at which bacteria were collected. Data are from a representative experiment (*n*=2 biological).**

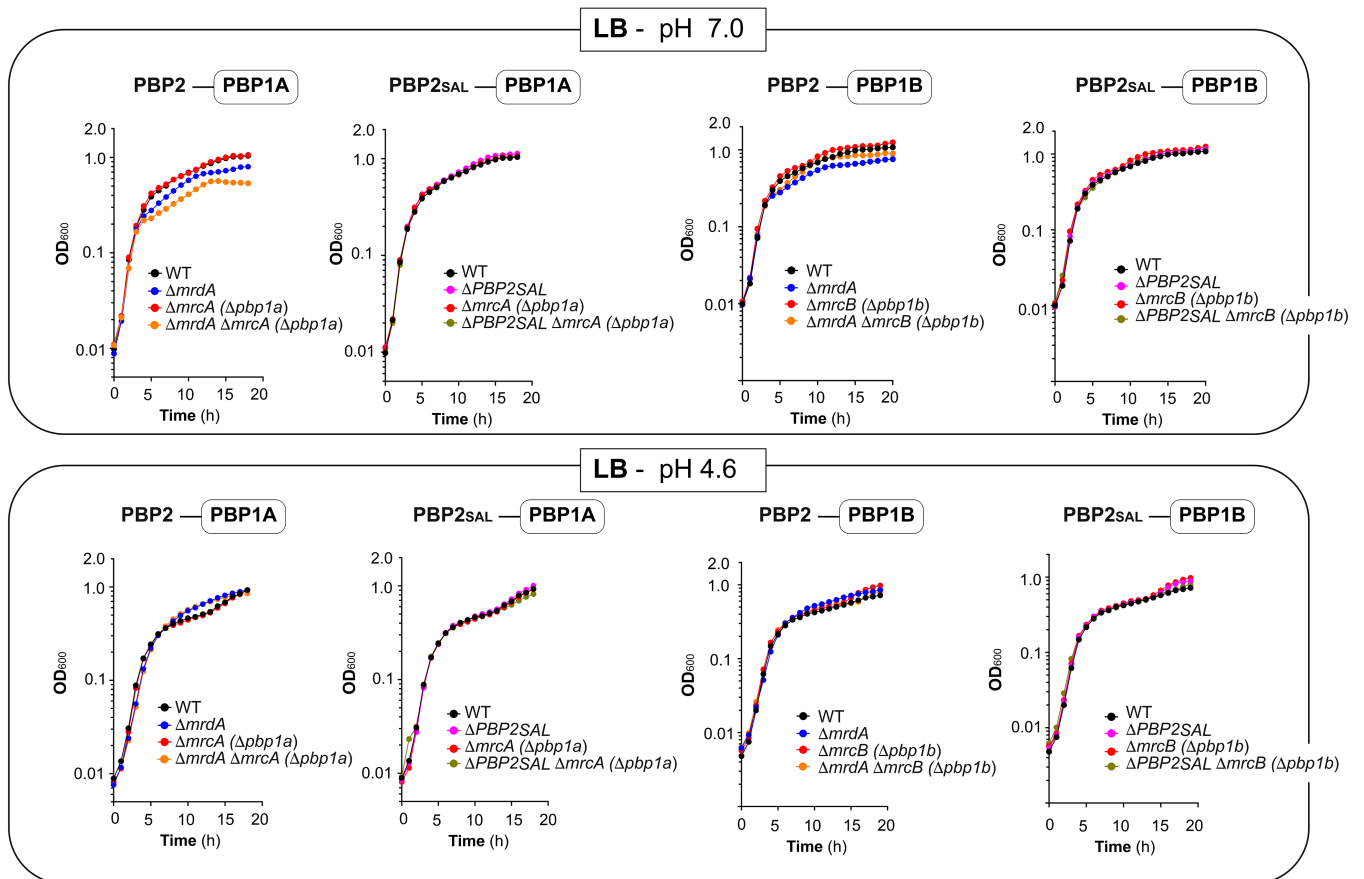

**Supplementary Fig. 11. Growth curves of *S. Typhimurium* mutants defective in PBP2 or PBP2<sub>SAL</sub> and the bifunctional PBP1a (MrcA) or PBP1b (MrcB) cultured in nutrient rich LB medium at neutral or acidic pH.** Growth was monitored over time in a Tecan Spark microplate reader at 20 min intervals by measuring optical density at 600 nm wavelength. Note the lower final OD<sub>600</sub> values in  $\Delta mrdA$  mutants lacking PBP2 growing at pH 7.0, associated with the formation of large, rounded cells unable to divide (see Fig. 1a main manuscript). ( $n=2$  biological).

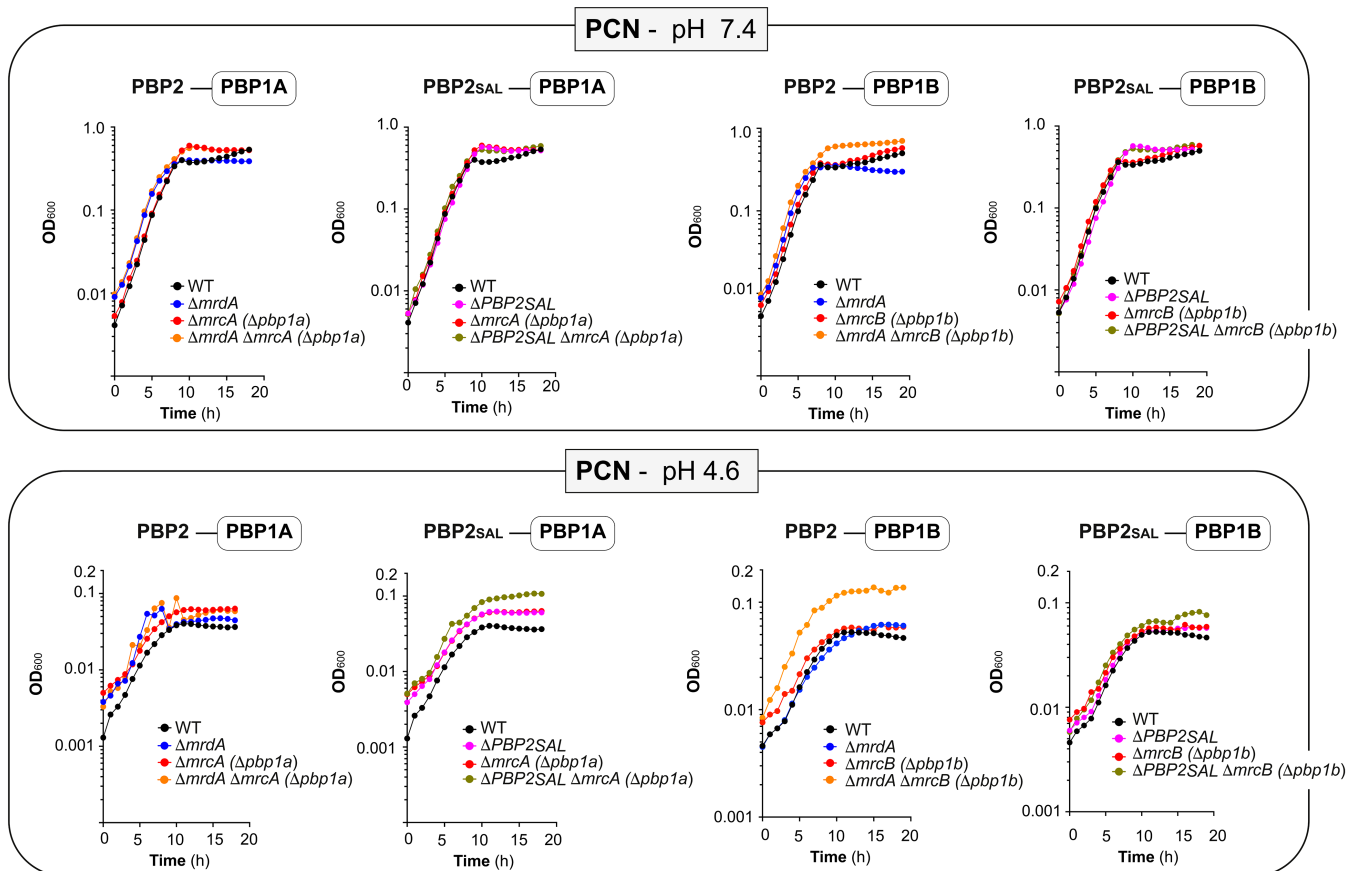

**Supplementary Fig. 12. Growth curves of *S. Typhimurium* mutants defective in PBP2 or PBP2<sub>SAL</sub> and the bifunctional PBP1a (MrcA) or PBP1b (MrcB) cultured in minimal nutrient poor PCN medium at neutral or acidic pH.** Growth was monitored over time in a Tecan Spark microplate reader at 20 min intervals by measuring optical density at 600 nm wavelength. Note the increase in final OD<sub>600</sub> values for mutants lacking PBP1a growing at acidic pH in the absence of PBP2. A similar effect is observed for the mutant lacking PBP1a and PBP2<sub>SAL</sub>. (*n*=2 biological).

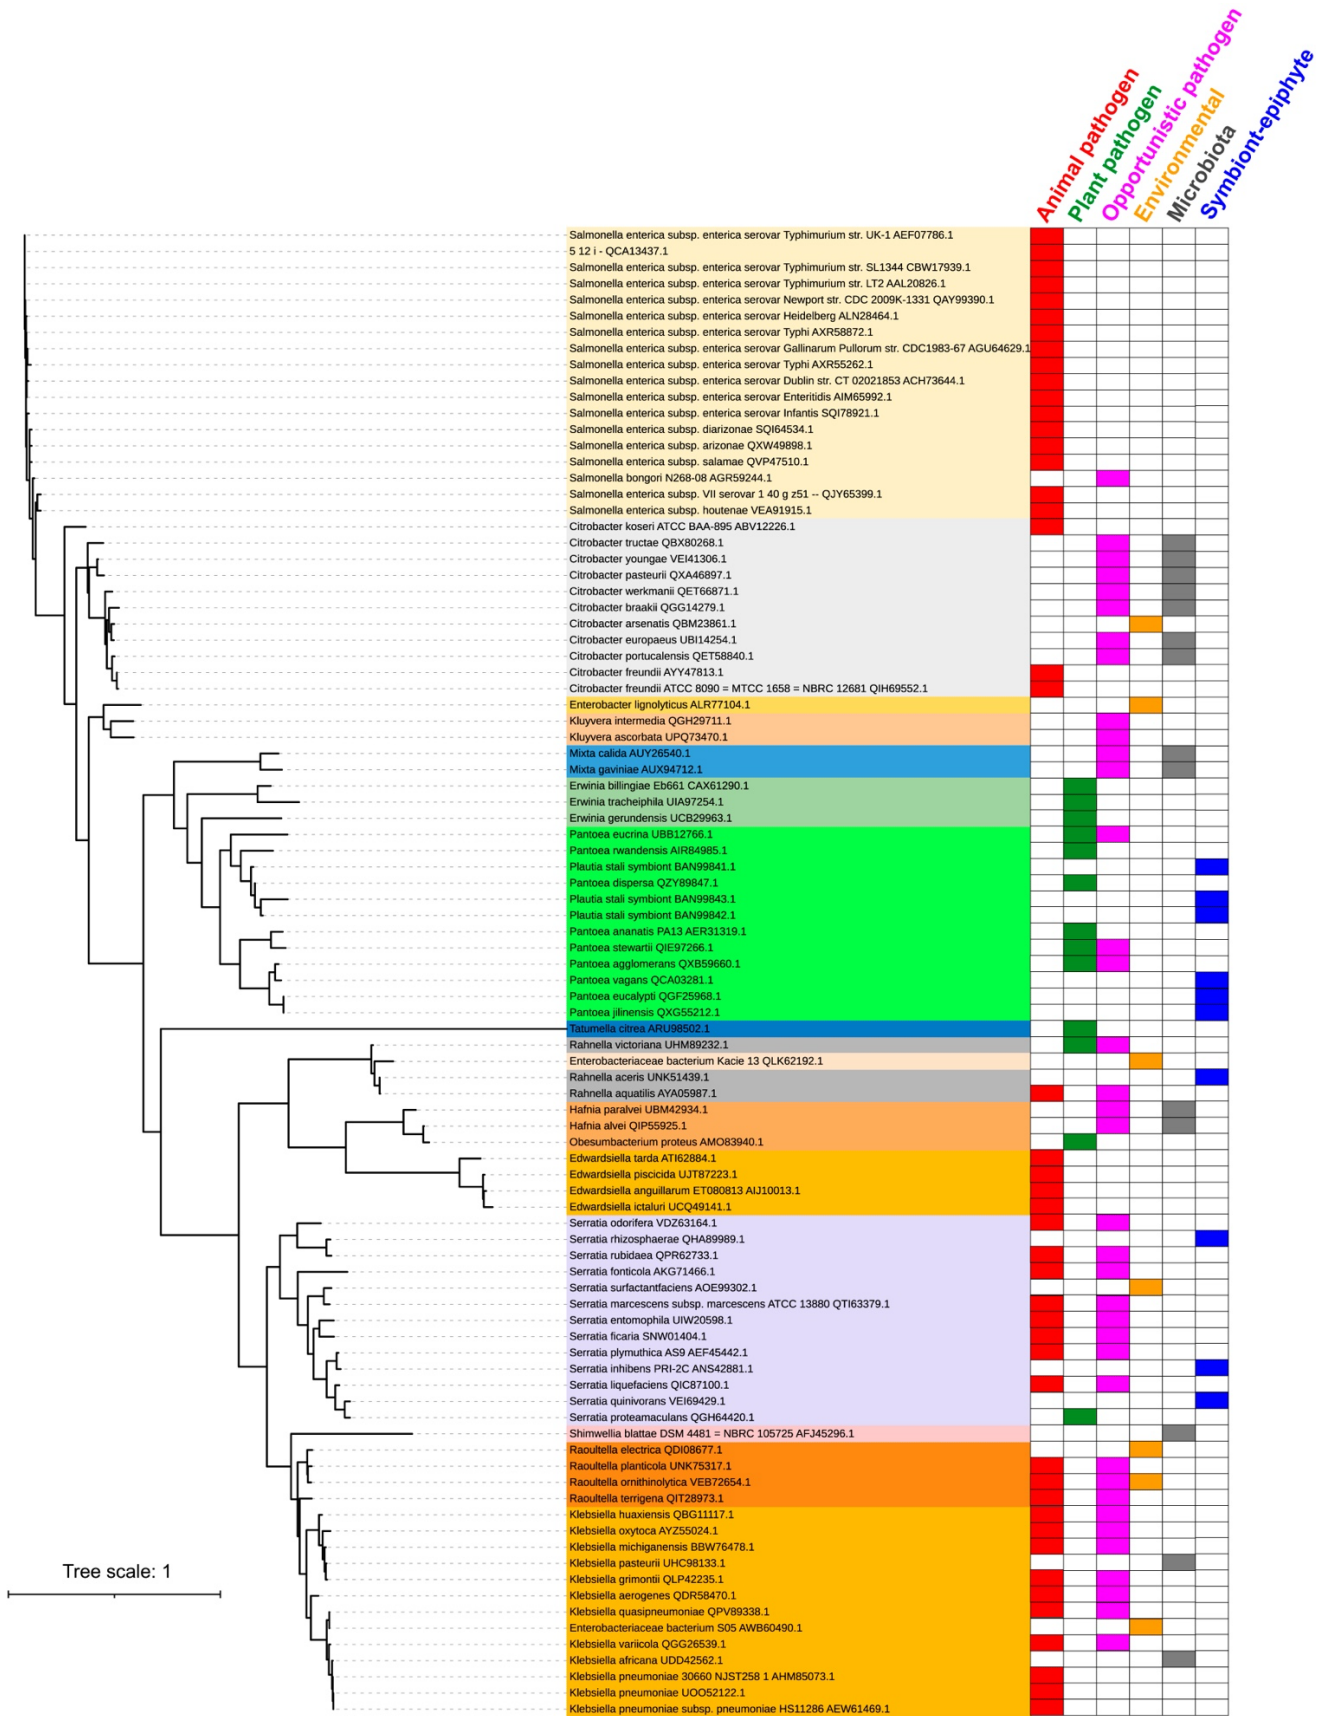



**Supplementary Fig. 13. Phylogenetic distribution of PBP2<sub>SAL</sub> orthologs in bacterial genera of the order *Enterobacterales*.** The maximum-likelihood phylogenetic tree was built by analyzing 325 representative and complete genomes of the order *Enterobacterales* with hits that BLASTp showed  $\geq 60\%$  identical and with  $\geq 90\%$  coverage versus PBP2<sub>SAL</sub> of *S. Typhimurium* SL1344 (Uniprot entry E1WGF1), used as query. See *Methods* for details. The columns on the right indicate the lifestyles of the distinct genera, which were classified according to the literature as pathogenic (animal or plant), opportunistic pathogen, environmental, microbiota (human or other animals), and symbiotic/epiphyte.

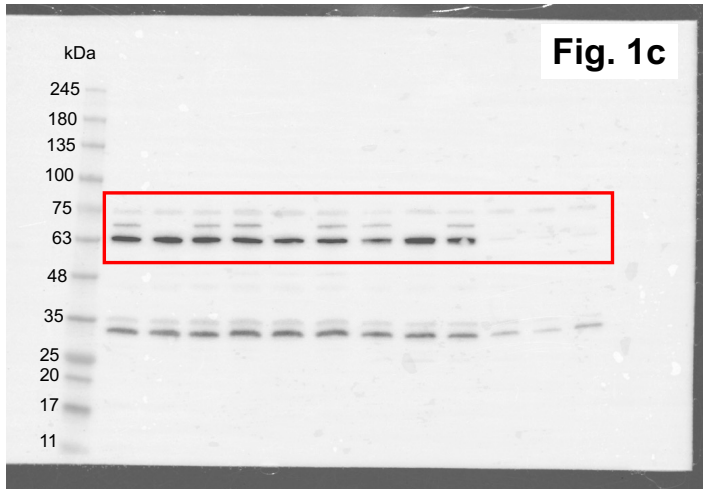

**Fig. 1c.** Upper image: Western blot  
anti-PBP2/PBP3

**Fig. 1c.** Middle image: Western blot anti-FLAG

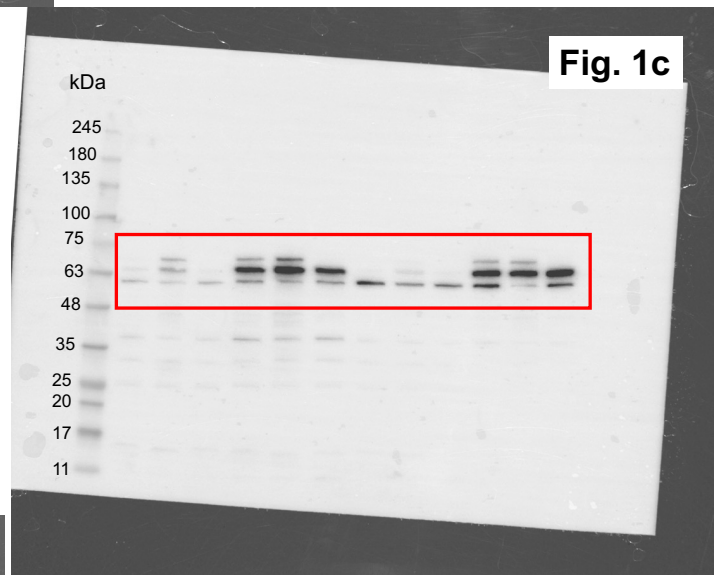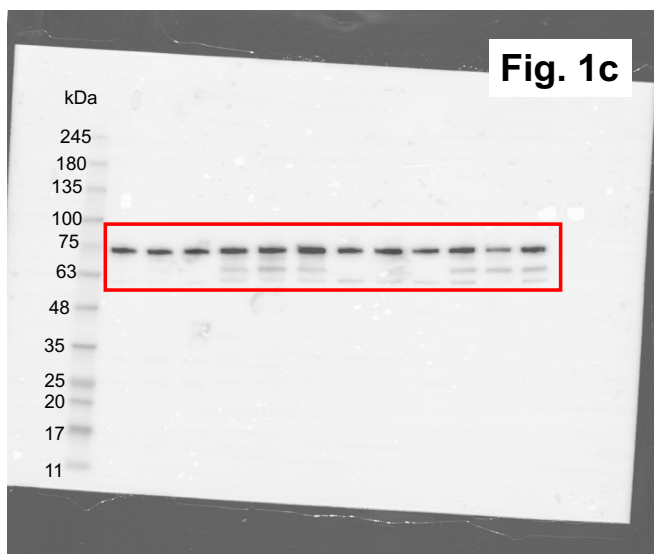

**Fig. 1c.** Lower image: Western blot  
anti-DnaK

**Supplementary Fig. 14. Original uncropped Western blots corresponding to Figure 1c of manuscript.** Red boxes denote the areas of the blots that were used to compose Figure 1c.

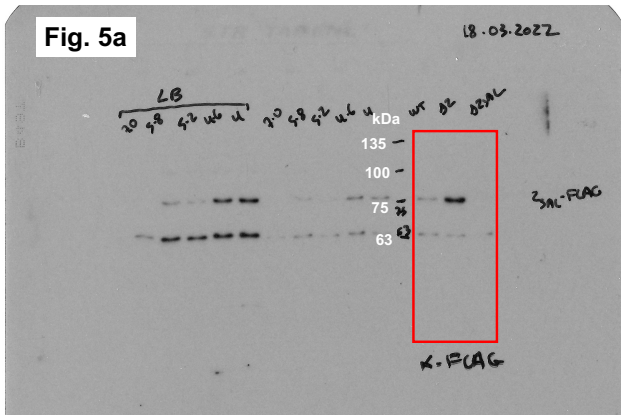

**Fig. 5a.** Upper image: Western anti-FLAG

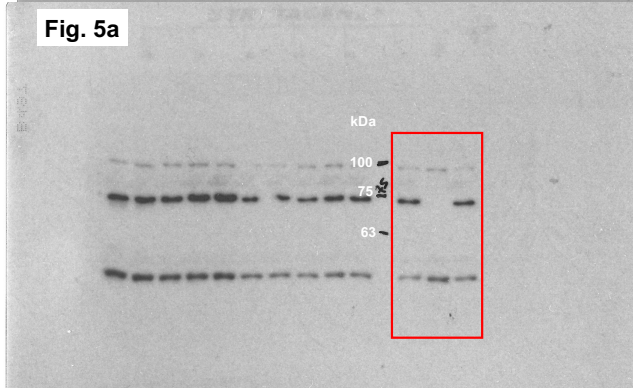

**Fig. 5a.** Middle image: Western anti-PBP2.

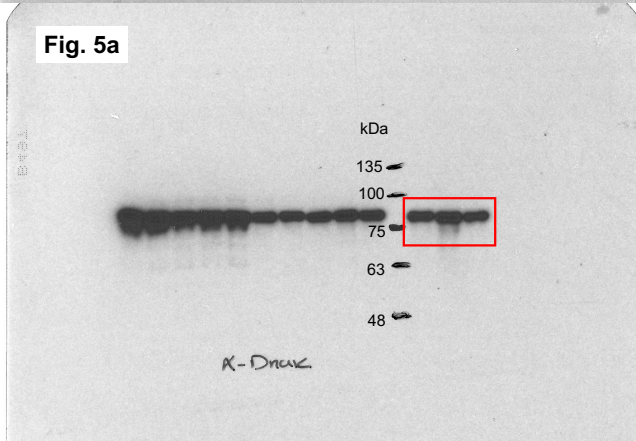

**Fig. 5a.** Lower image: Western anti-DnaK

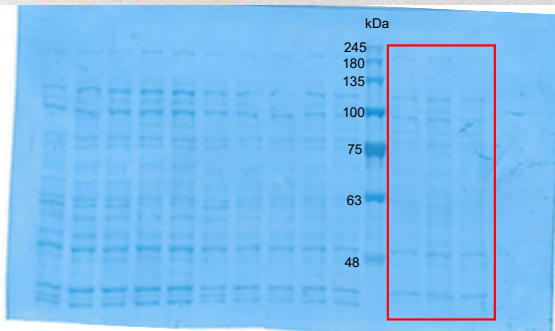

PVDF membrane of the blots shown in Fig. 5a

**Supplementary Fig. 15. Original uncropped Western blots corresponding to Figure 5a of manuscript.** Red boxes denote the areas of the blots that were used to compose Figure 5a.

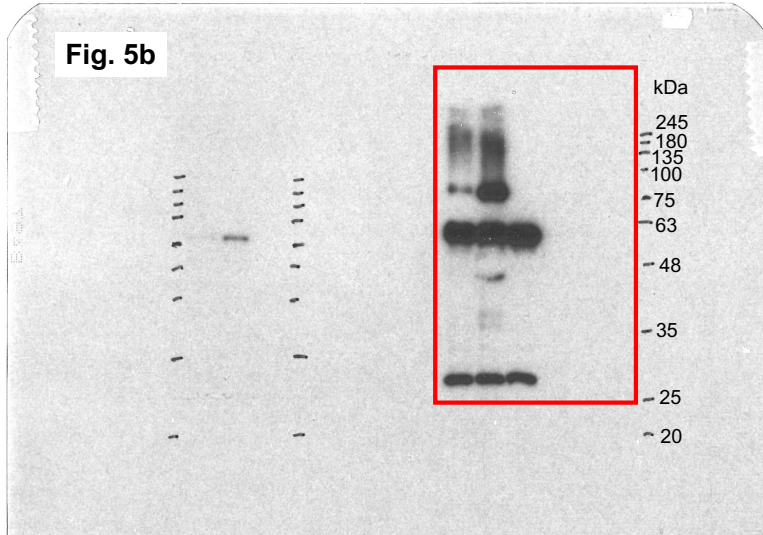

**Fig. 5b.** Left image: Western anti-FLAG

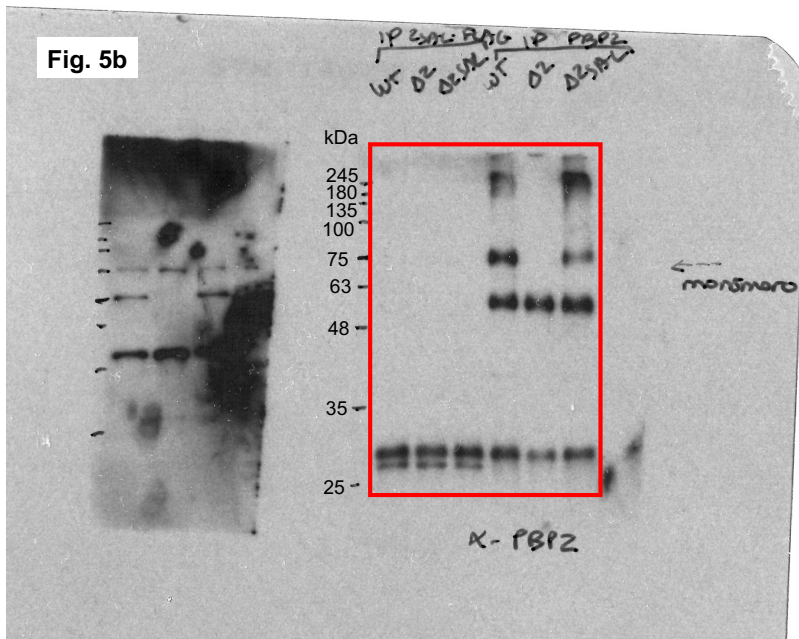

**Fig. 5b.** Right image: Western anti-PBP2

**Supplementary Fig. 16. Original uncropped Western blots corresponding to Figure 5b of manuscript.** Red boxes denote the areas of the blots that were used to compose Figure 5b.

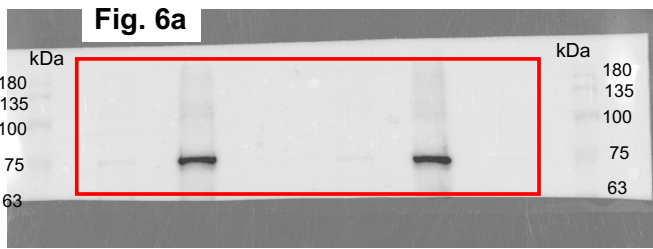

**Fig. 6a.** Upper image: Western anti-HA

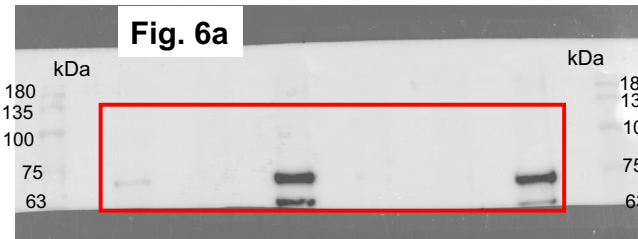

**Fig. 6a.** Middle-upper image: Western anti-PBP2

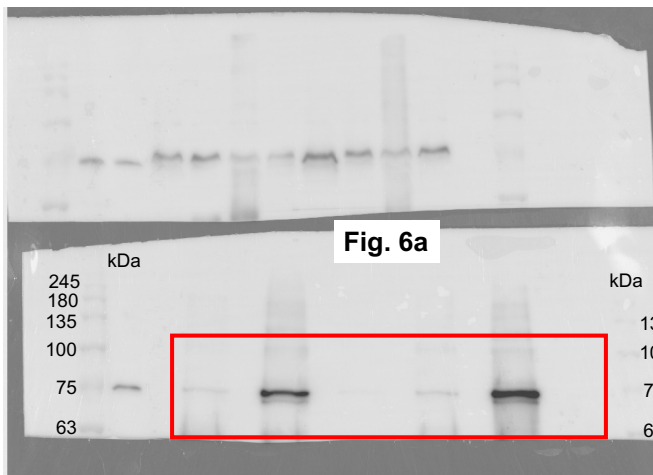

**Fig. 6a.** Middle-lower image: Western anti-HA

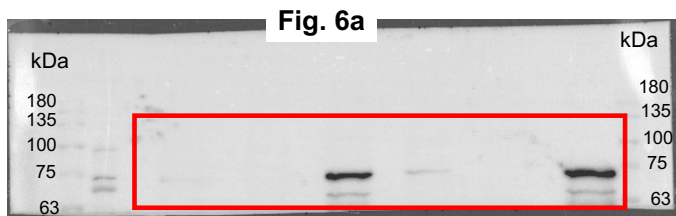

**Fig. 6a.** Lower image: Western anti-PBP2

**Supplementary Fig. 17. Original uncropped Western blots corresponding to Figure 6a of manuscript.** Red boxes denote the areas of the blots that were used to compose Figure 6a.

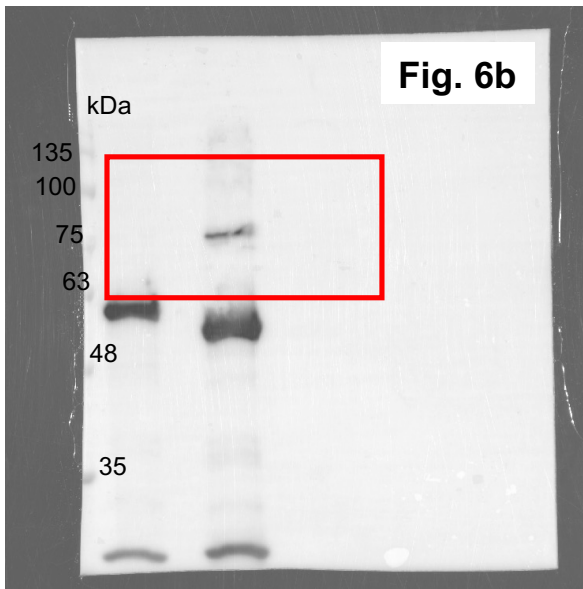

**Fig. 6b.** Upper image: Western anti-HA

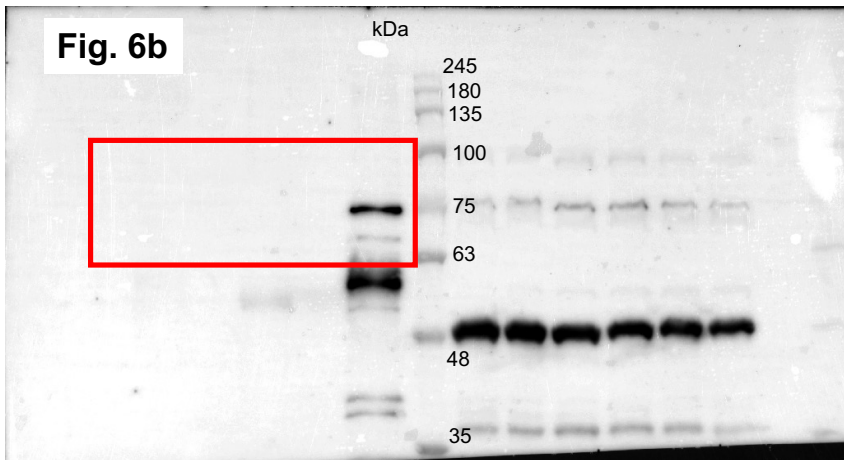

**Fig. 6b.** Lower image: Western anti-PBP2

**Supplementary Fig. 18. Original uncropped Western blots corresponding to Figure 6b of manuscript.** Red boxes denote the areas of the blots that were used to compose Figure 6b.

**Fig. 6c.** Upper image: Western anti-HA

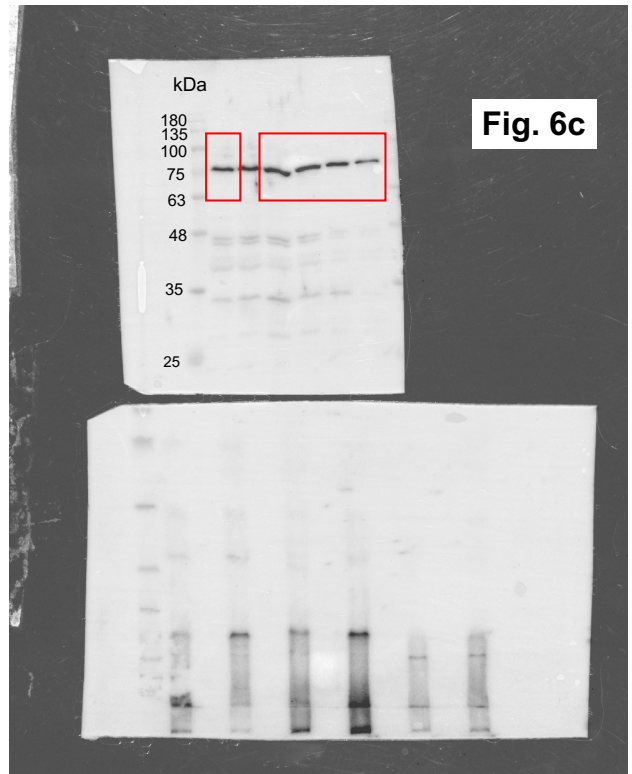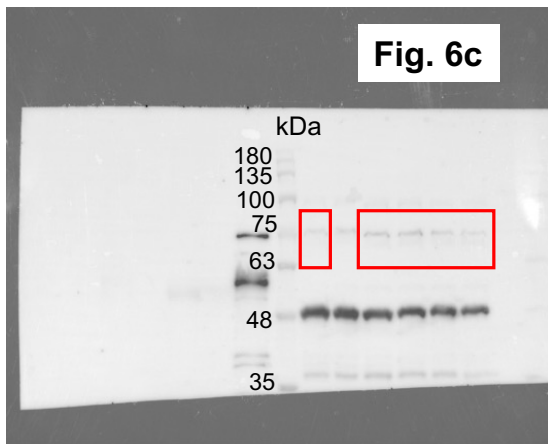

**Fig. 6c.** Middle image: Western anti-PBP2

**Fig. 6c.** Lower image: Western anti-FLAG

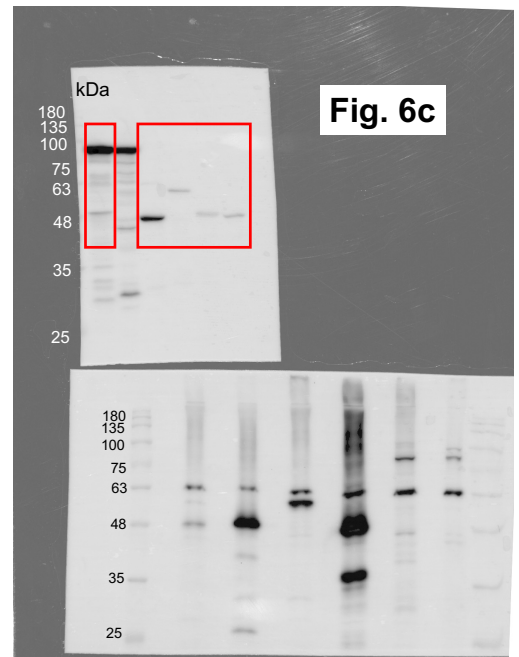

**Supplementary Fig. 19. Original uncropped Western blots corresponding to Figure 6c of manuscript.** Red boxes denote the areas of the blots that were used to compose Figure 6c.

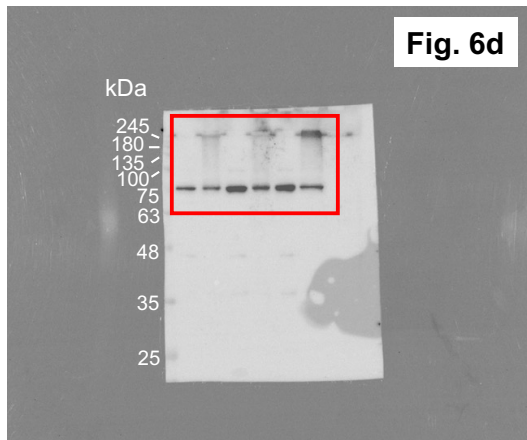

**Fig. 6d.** Left upper image: Western anti-HA

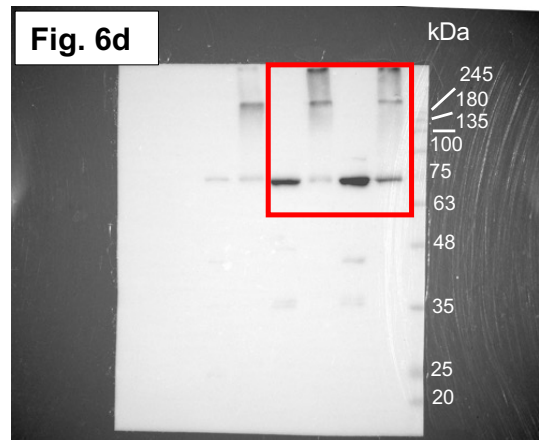

**Fig. 6d.** Right upper image: Western anti-HA

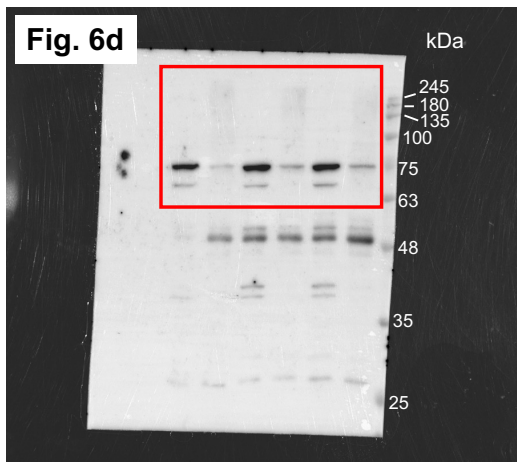

**Fig. 6d.** Left middle image: Western anti-PBP2

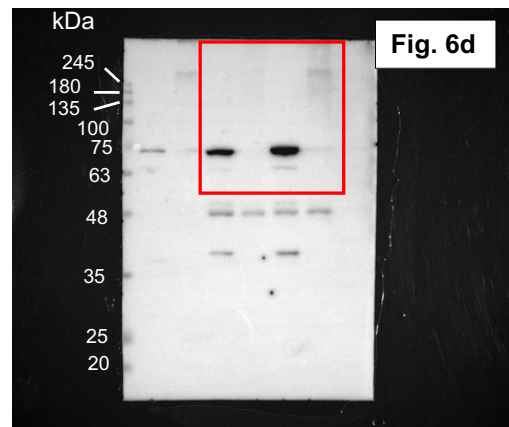

**Fig. 6d.** Right middle image: Western anti-PBP2

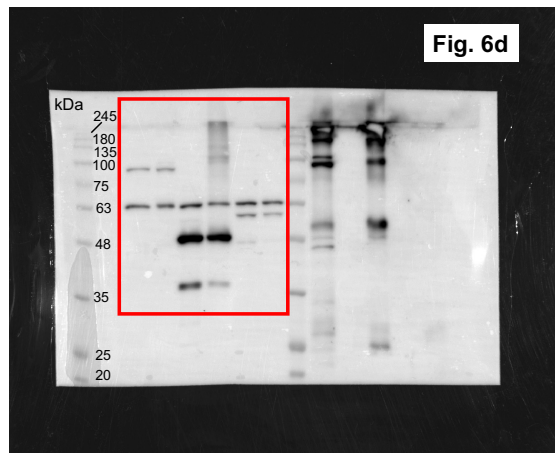

**Fig. 6d.** Left lower image: Western anti-FLAG

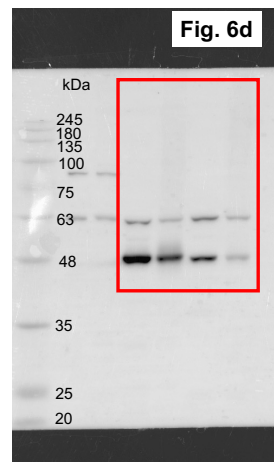

**Fig. 6d.** Right lower image: Western anti-FLAG

**Supplementary Fig. 20. Original uncropped Western blots corresponding to Figure 6d of manuscript.** Red boxes denote the areas of the blots that were used to compose Figure 6d.



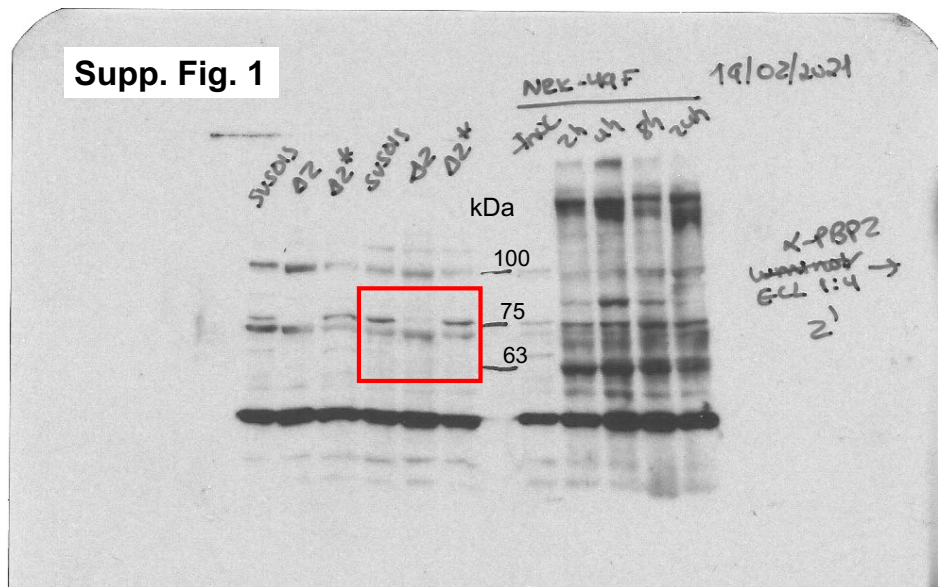

**Supplementary Fig. 21. Image of original uncropped Western blot used in Supplementary**

**Fig. 1.** Red box denotes the area of the blots shown in Supplementary Fig. 1.

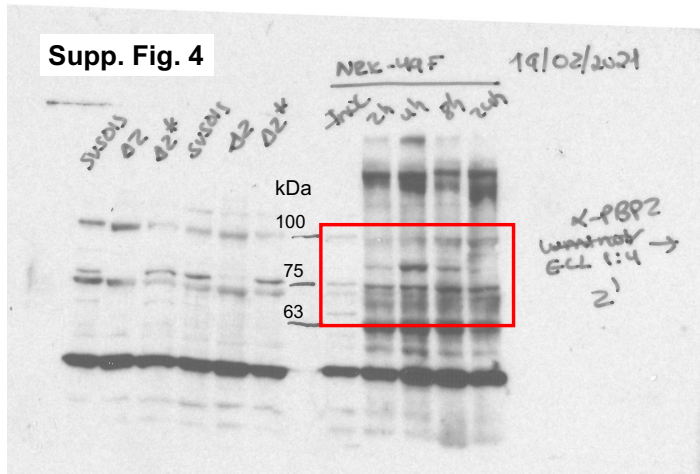

**Supp. Fig. 4.** Upper image: Western anti-PBP2

**Supp. Fig. 4.** Middle image: Western anti-FLAG

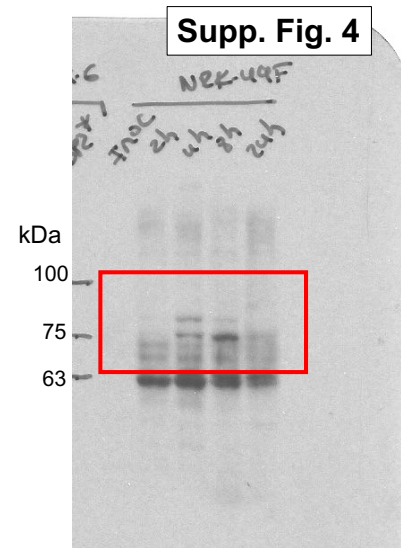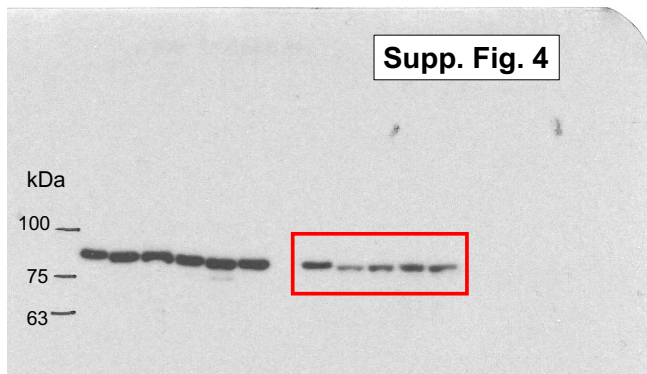

**Supp. Fig. 4.** Lower image: Western anti-DnaK

**Supplementary Fig. 22. Images of original uncropped Western blots used in Supp. Fig. 4.**

Red boxes denote the area of the blots shown in Supp. Fig. 4.

**Supplementary Table 1.** Single-nucleotide polymorphisms (SNPs) resulting in non-synonymous mutations identified by whole-genome sequencing (WGS) in the  $\Delta mrdA$  null mutant described in this study, strain MD5052, derivative of strain SV5015.<sup>(\*)</sup>

| Coordinate<br>SNP | Locus ID (gene)             | Protein                                            | Strain/<br>nucleotide change |                          | Effect    |
|-------------------|-----------------------------|----------------------------------------------------|------------------------------|--------------------------|-----------|
|                   |                             |                                                    | SV5015 <sup>(†)</sup>        | MD5052 ( $\Delta mrdA$ ) |           |
| 635606            | SL1344_0564 ( <i>manX</i> ) | PTS mannose transporter subunit IIAB transporter   | A > T                        | A > T                    | Glu95Val  |
| 2135472           | SL1344_2039 ( <i>phsC</i> ) | Thiosulfate reductase cytochrome B subunit         | G > T                        | G > T                    | Gly110Val |
| 2147535           | SL1344_2048 ( <i>hisG</i> ) | ATP phosphoribosyl-transferase (HisG)              | C > T                        | C > T                    | Pro69Leu  |
| 2409008           | SL1344_2272                 | Hypothetical membrane protein                      | ----                         | T > G                    | Val116Gly |
| 2959813           | SL1344_2772                 | Hypothetical membrane protein                      | ----                         | T > G                    | Val405Gly |
| 3994801           | SL1344_3738                 | hypothetical NtrC-family transcriptional regulator | ----                         | C > A                    | Gln261Lys |

(\*) WGS confirmed endpoints of the  $\Delta mrdA$  deletion in coordinates 701512-703277. Genome comparisons were made against genome sequence of *S. Typhimurium* strain SL1344 (NCBI entry no. FQ312003.1).

(†) Strain SV5015 is the prototrophic His<sup>+</sup> strain used as wild type in this study. SV5015 was generated from the auxotrophic strain SL1344 by phage transduction and was also sequenced by WGS, as reported in our previous study<sup>1</sup>.

## Supplementary reference

1. Castanheira, S. *et al.* A Specialized Peptidoglycan Synthase Promotes Salmonella Cell Division inside Host Cells. *mBio* **8**, e01685-17 (2017).
